# Supplementary material for: Chemical Characterization and Anti-HIV-1 Activity Assessment of Iridoids and Flavonols from Scrophularia trifoliata
Source: MDPI journal article supplement (doi:10.3390/molecules26164777), 2021-08-06

## Supplementary Materials

# Chemical Characterization and Anti-HIV-1 Activity Assessment of Iridoids and Flavonols from *Scrophularia trifoliata*

Francesca Guzzo <sup>1</sup>, Rosita Russo <sup>1</sup>, Cinzia Sanna <sup>2</sup>, Odeta Celaj <sup>1</sup>, Alessia Caredda <sup>3</sup>, Angela Corona <sup>3</sup>, Enzo Tramontano <sup>3</sup>, Antonio Fiorentino <sup>1,4</sup>, Francesca Esposito <sup>3,\*</sup> and Brigida D'Abrosca <sup>1,4,\*</sup>

<sup>1</sup> Department of Environmental Biological and Pharmaceutical Sciences and Technologies, DiSTABiF University of Campania Luigi Vanvitelli, Via Vivaldi 43, 81100 Caserta, Italy;

francesca.guzzo@unicampania.it (F.G.); rosita.russo@unicampania.it (R.R.);  
odeta.celaj@unicampania.it (O.C.); antonio.fiorentino@unicampania.it (A.F.)

<sup>2</sup> Department of Life and Environmental Sciences, University of Cagliari, Via Sant'Ignazio da Laconi 13, 09123 Cagliari, Italy; cinziasanna@unica.it

<sup>3</sup> Department of Life and Environmental Sciences, University of Cagliari, Cittadella Universitaria di Monserrato, ss554, km 4500, Monserrato, 09042 Cagliari, Italy;  
alessiacaredda@unica.it (A.C.);  
angela.corona@unica.it (A.C.); tramon@unica.it (E.T.)

<sup>4</sup> Department of Marine Biotechnologies, Stazione Zoologica Anton Dohrn, Villa Comunale, 80121 Naples, Italy

\* Correspondence: francescaesposito@unica.it (F.E.); brigida.dabrosca@unicampania.it (B.D.)

**Supplementary figure S1. CIGAR-HMBC experiment of compound 5**

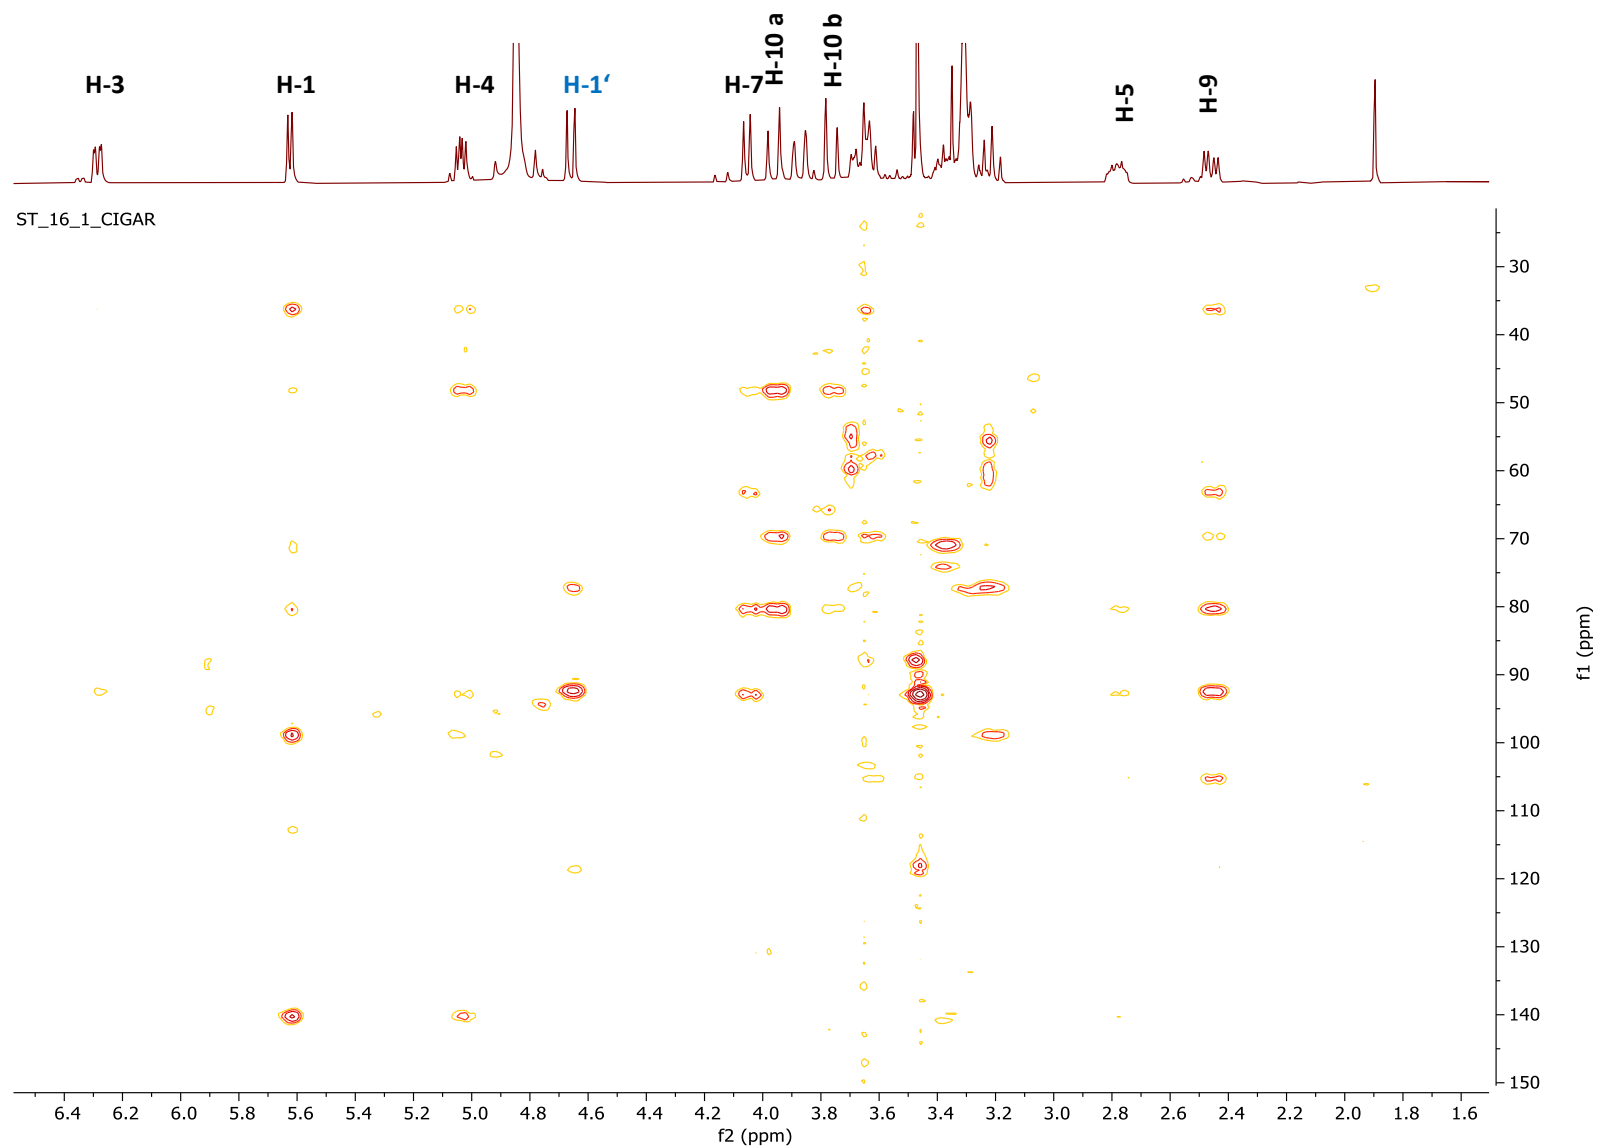

**Supplementary figure S2.** Key nOe correlation of compound **5** (top); NOESY experiment of compound **5** in CD<sub>3</sub>OD (bottom).

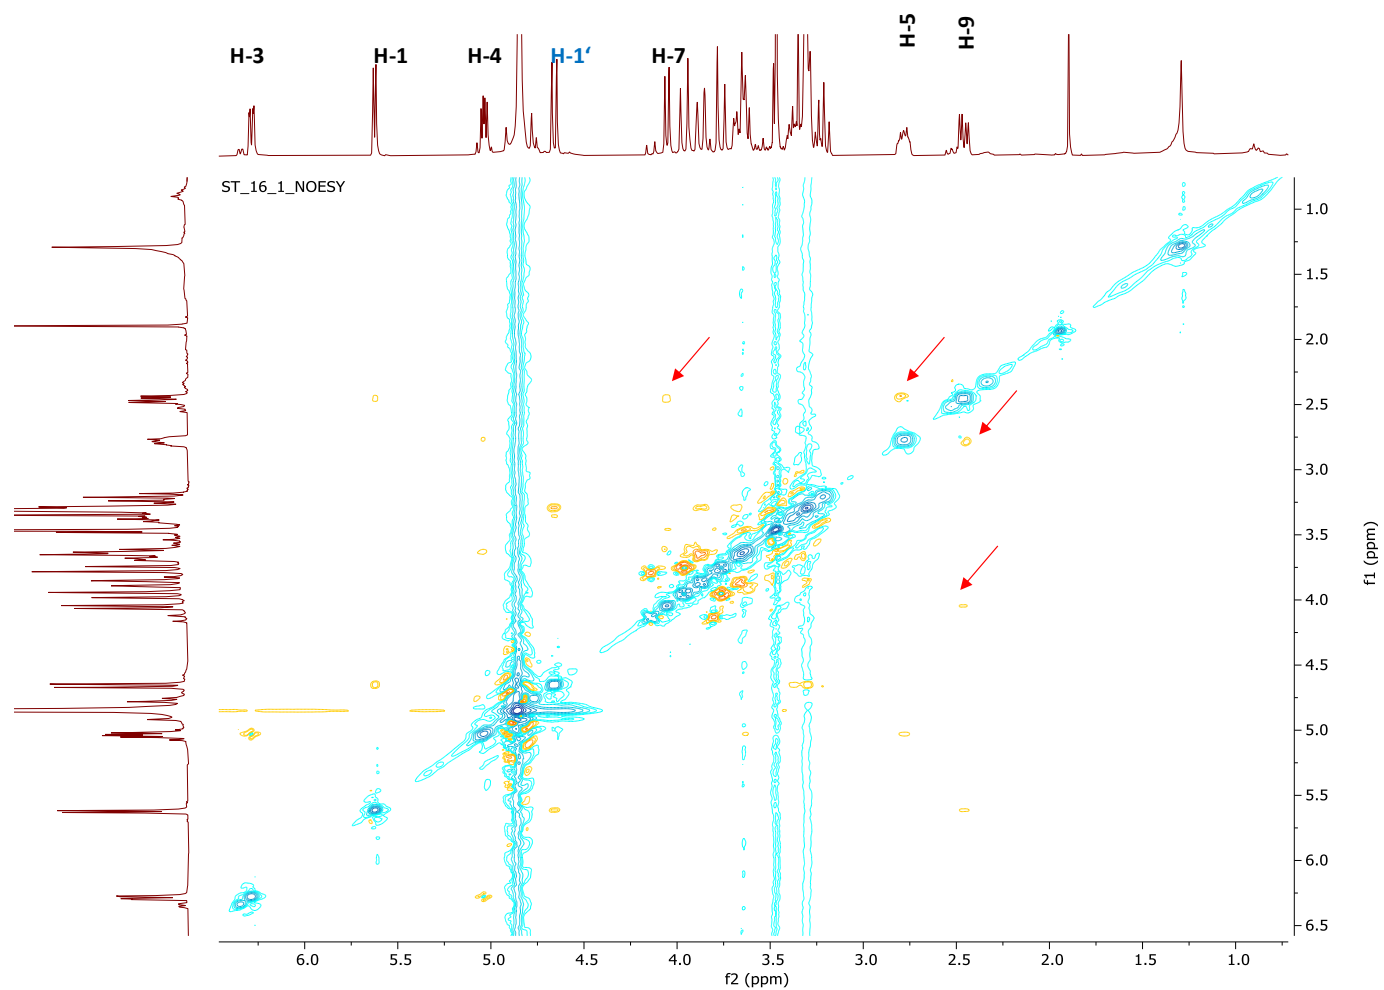

## Supplementary figure S3. HSQC experiment of compound **13**

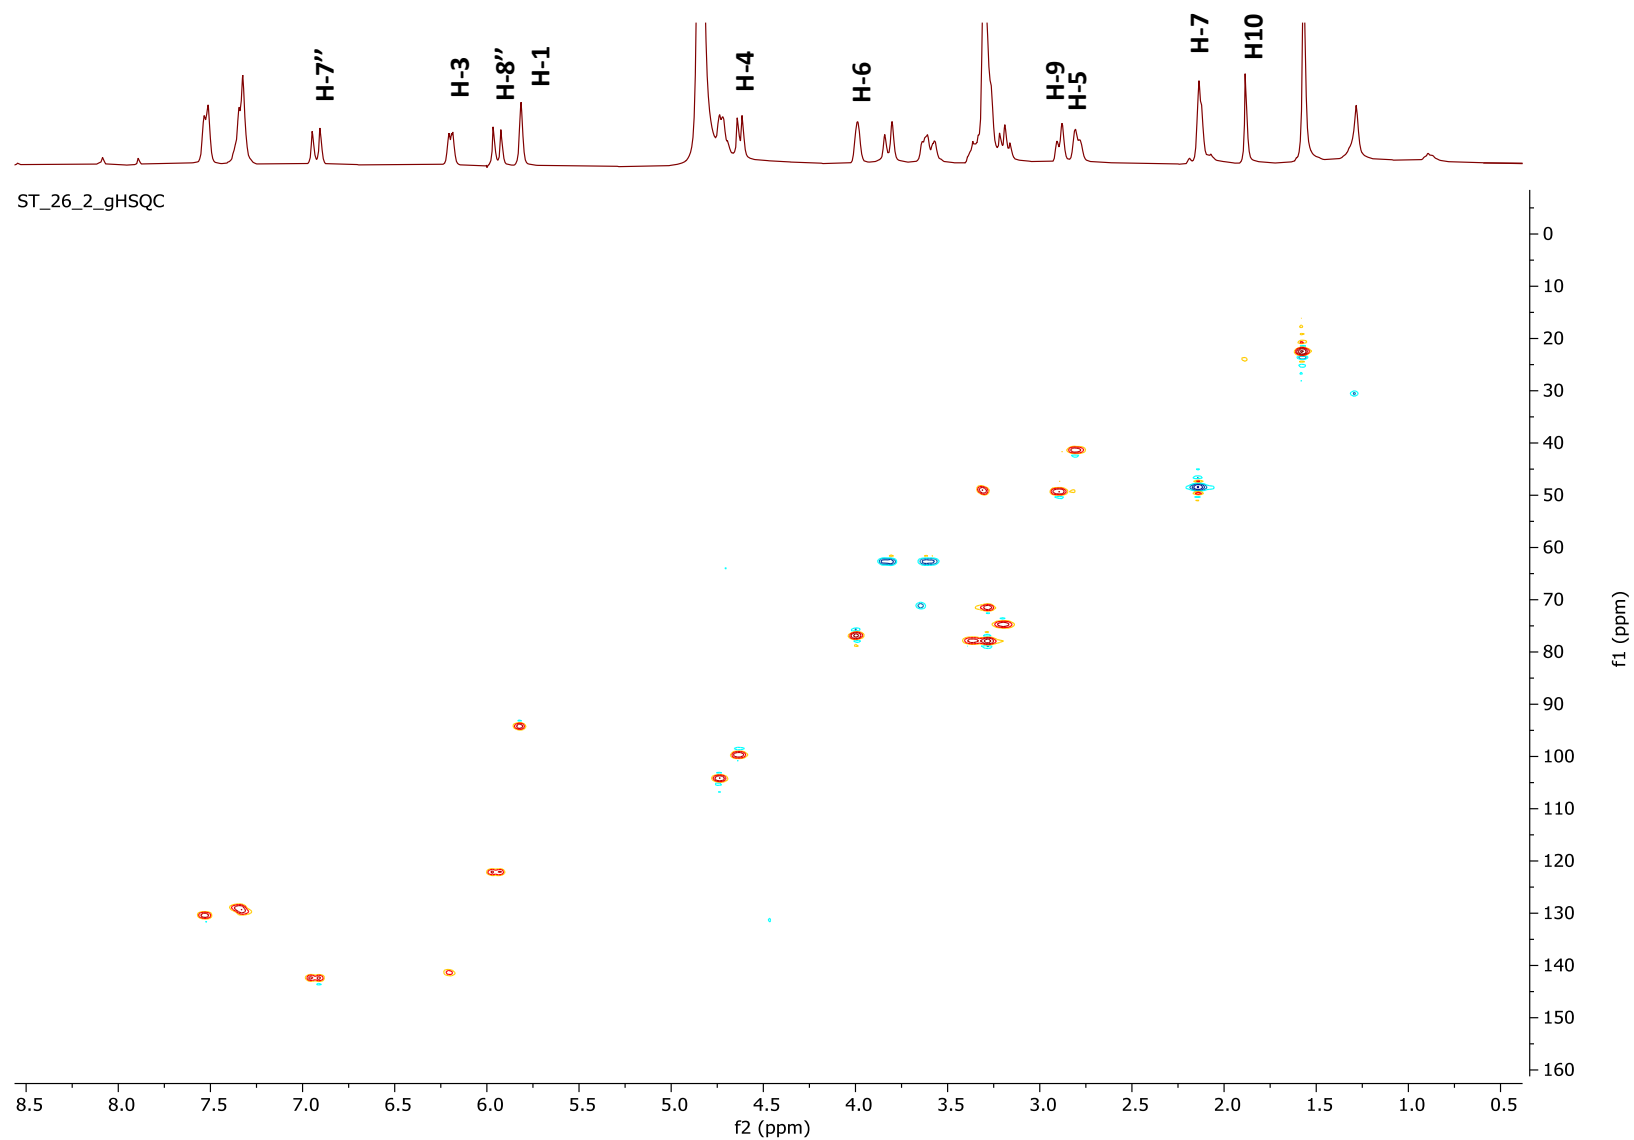

Supplement: s1 [file s1]
